# Supplementary material for: Arabinose Plays an Important Role in Regulating the Growth and Sporulation of <i>Bacillus subtilis</i> NCD-2
Source: Preprints.org preprint supplement (doi:10.20944/preprints202310.1502.v1), 2023-10-24
Supplement: Supplementary file 1 [file supplementary]

**Supplementaly file**


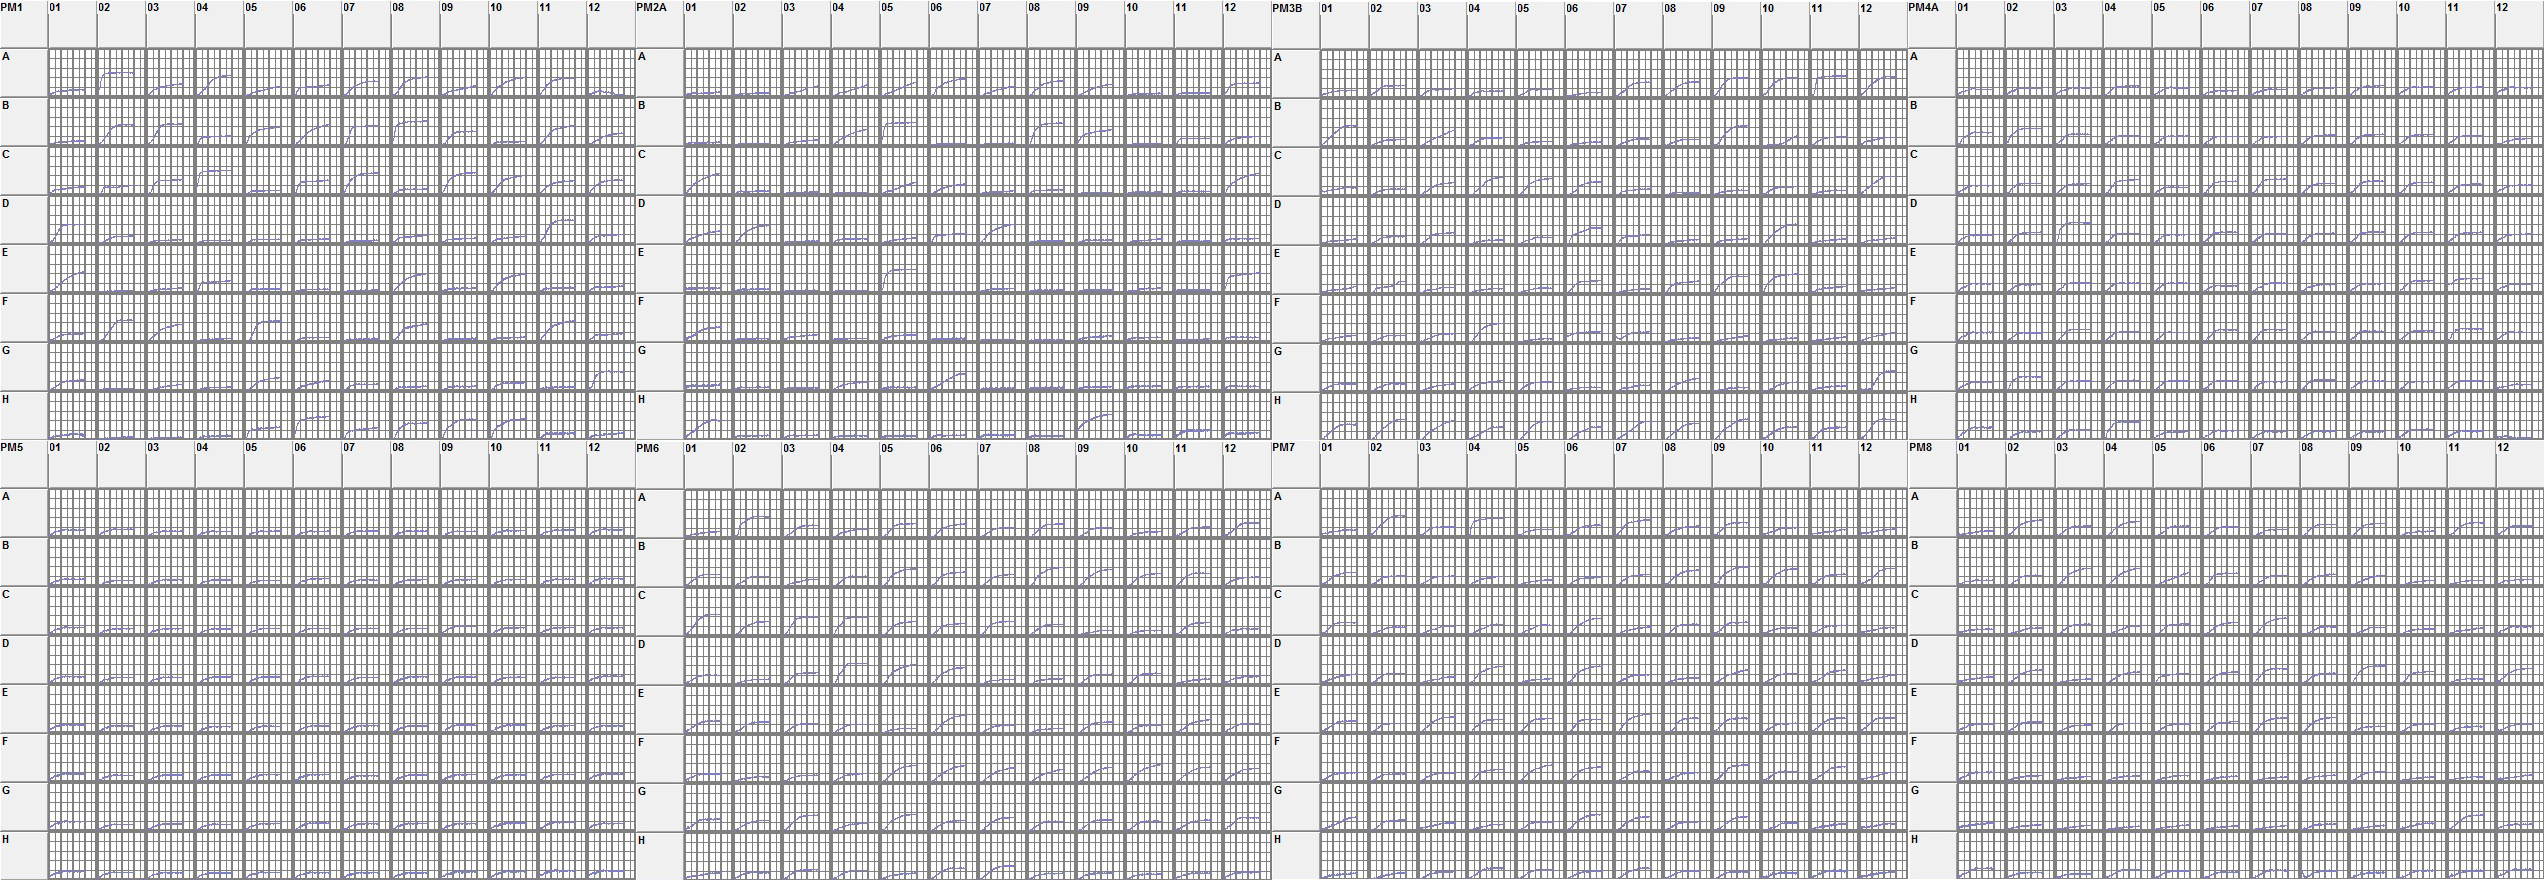


Supplementary Figure 1. Phenotype microarrays analysis of B. subtilis NCD-2. Letters A-H and numbers 01-12 refer to the well co-ordinates on the microarray plates, each square such as A01 displays time on the X-axis and redox signal intensity on the Y-axis.


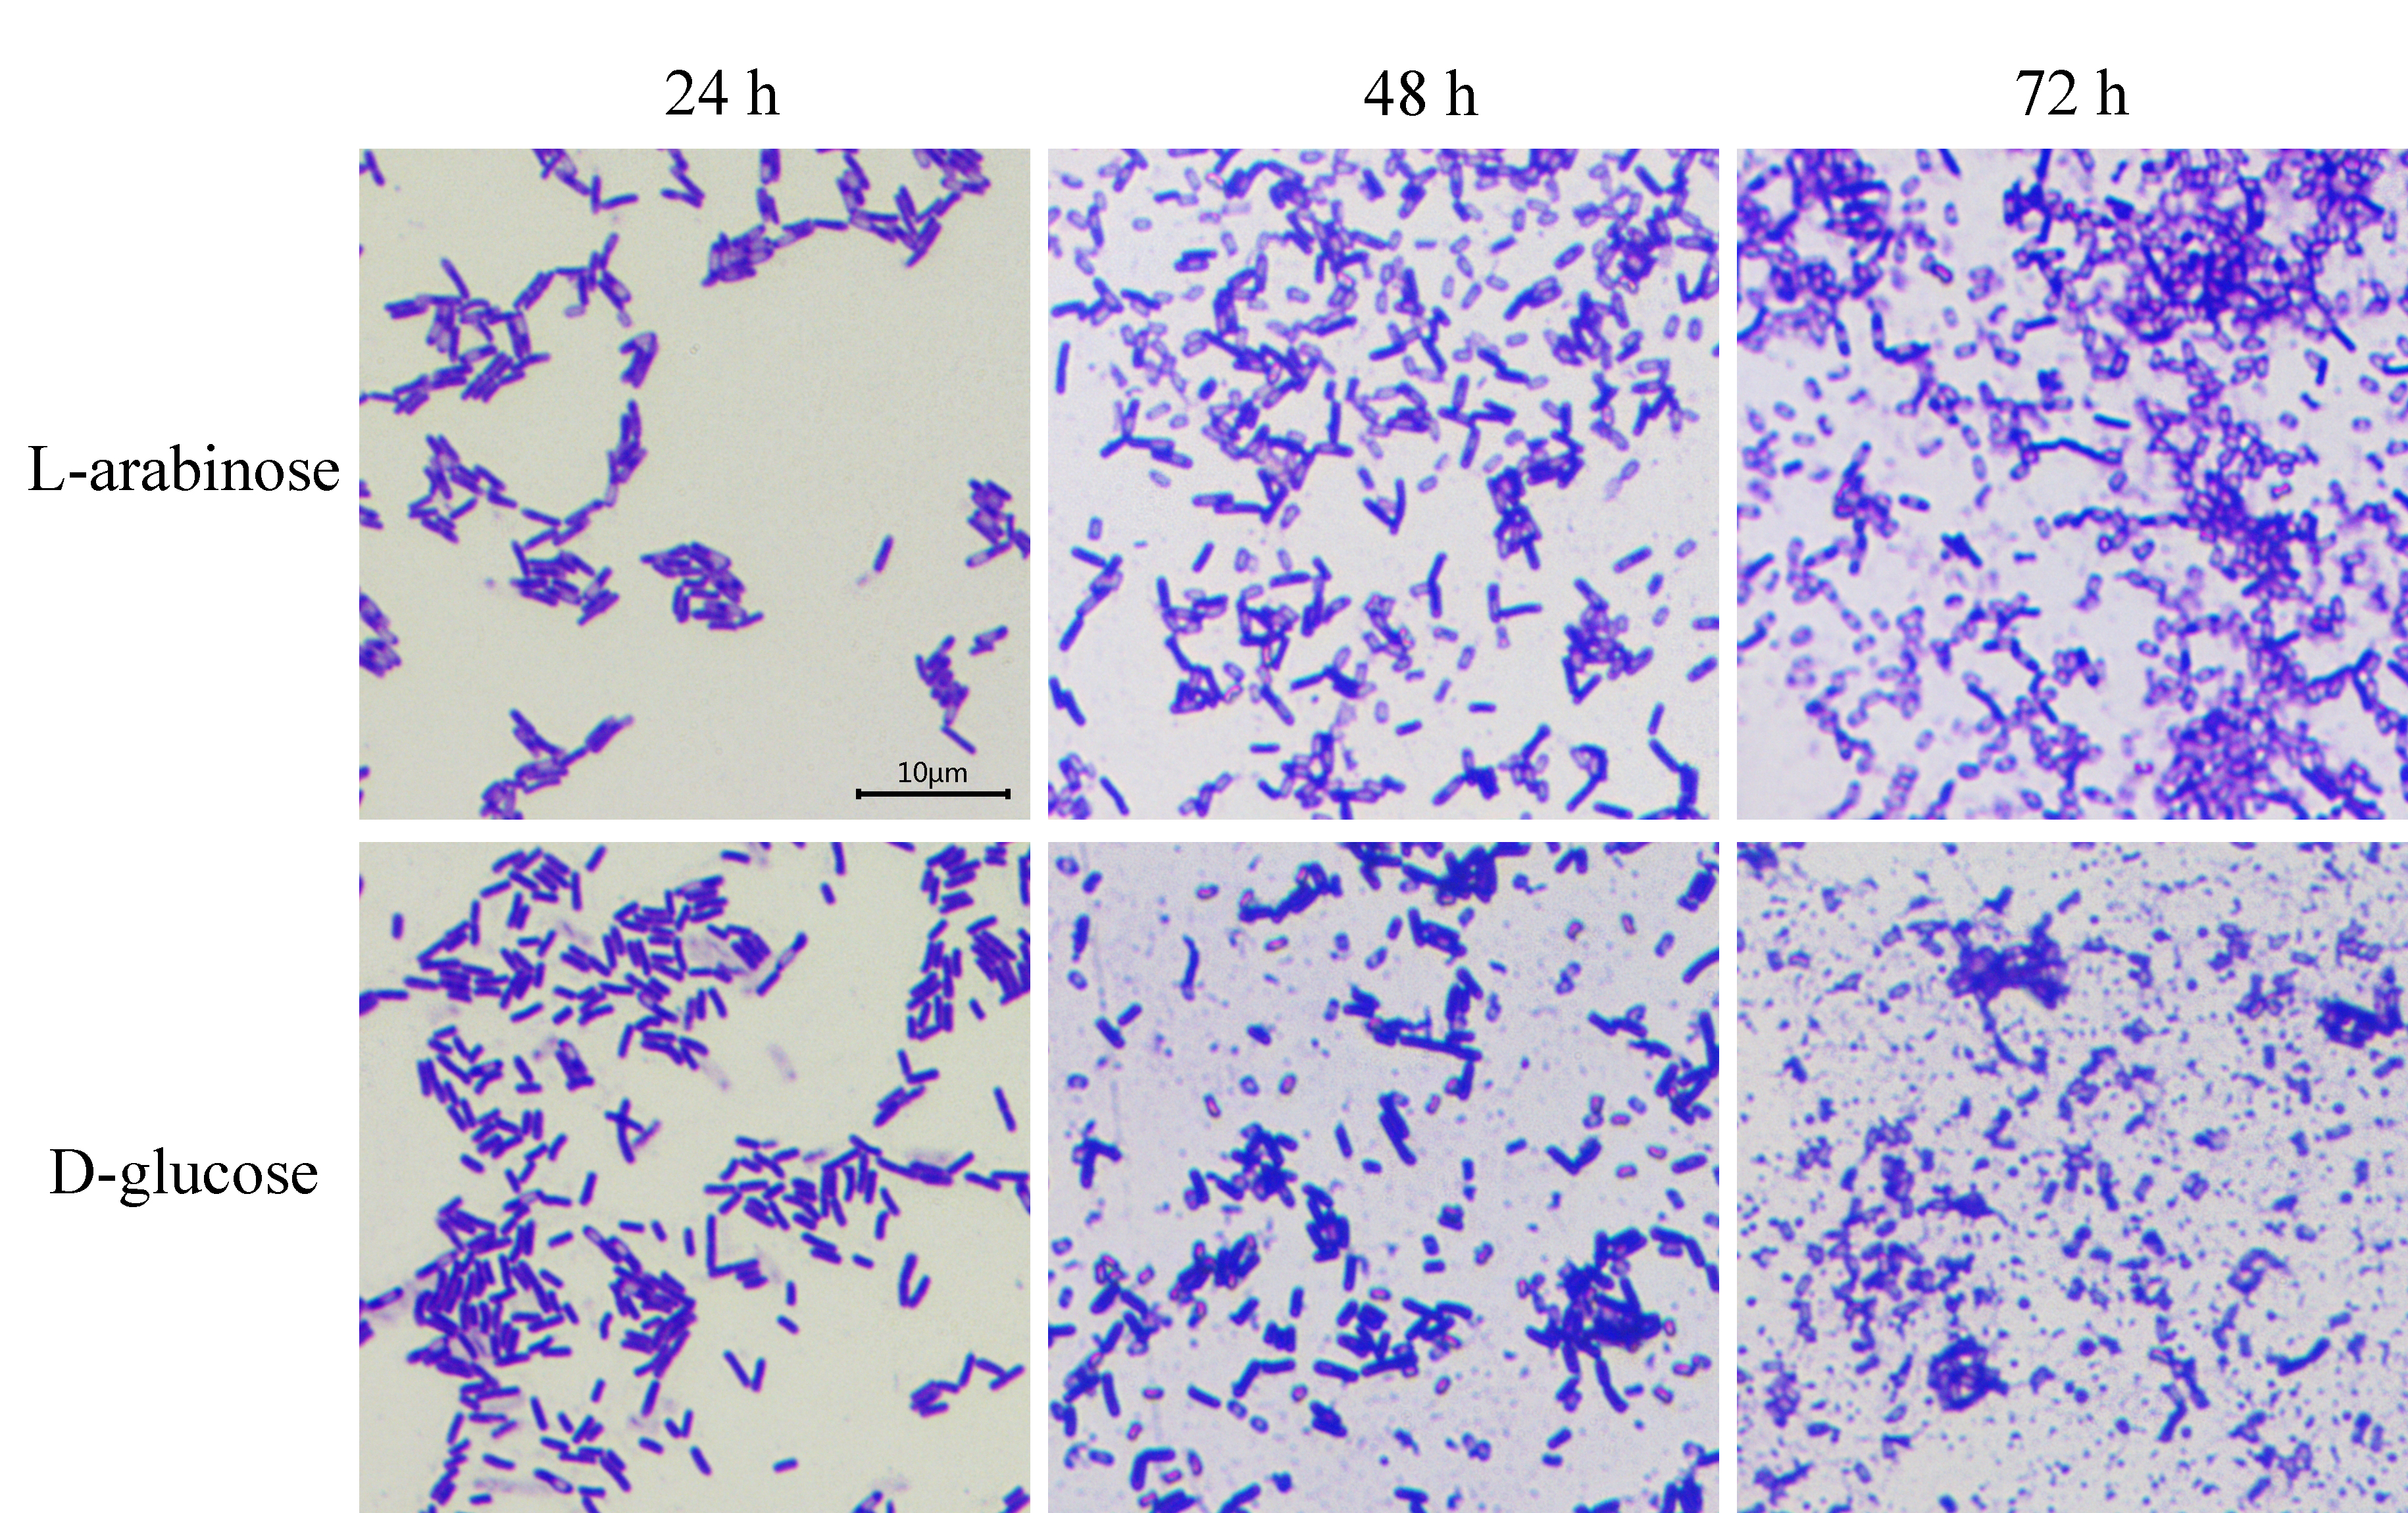


Supplimentary Figure 2. Proportion of spores of strain NCD-2 in M9 medium with L-arabinose and D-glucose as carbon sources, at 24, 48 and 72 h after inoculation.


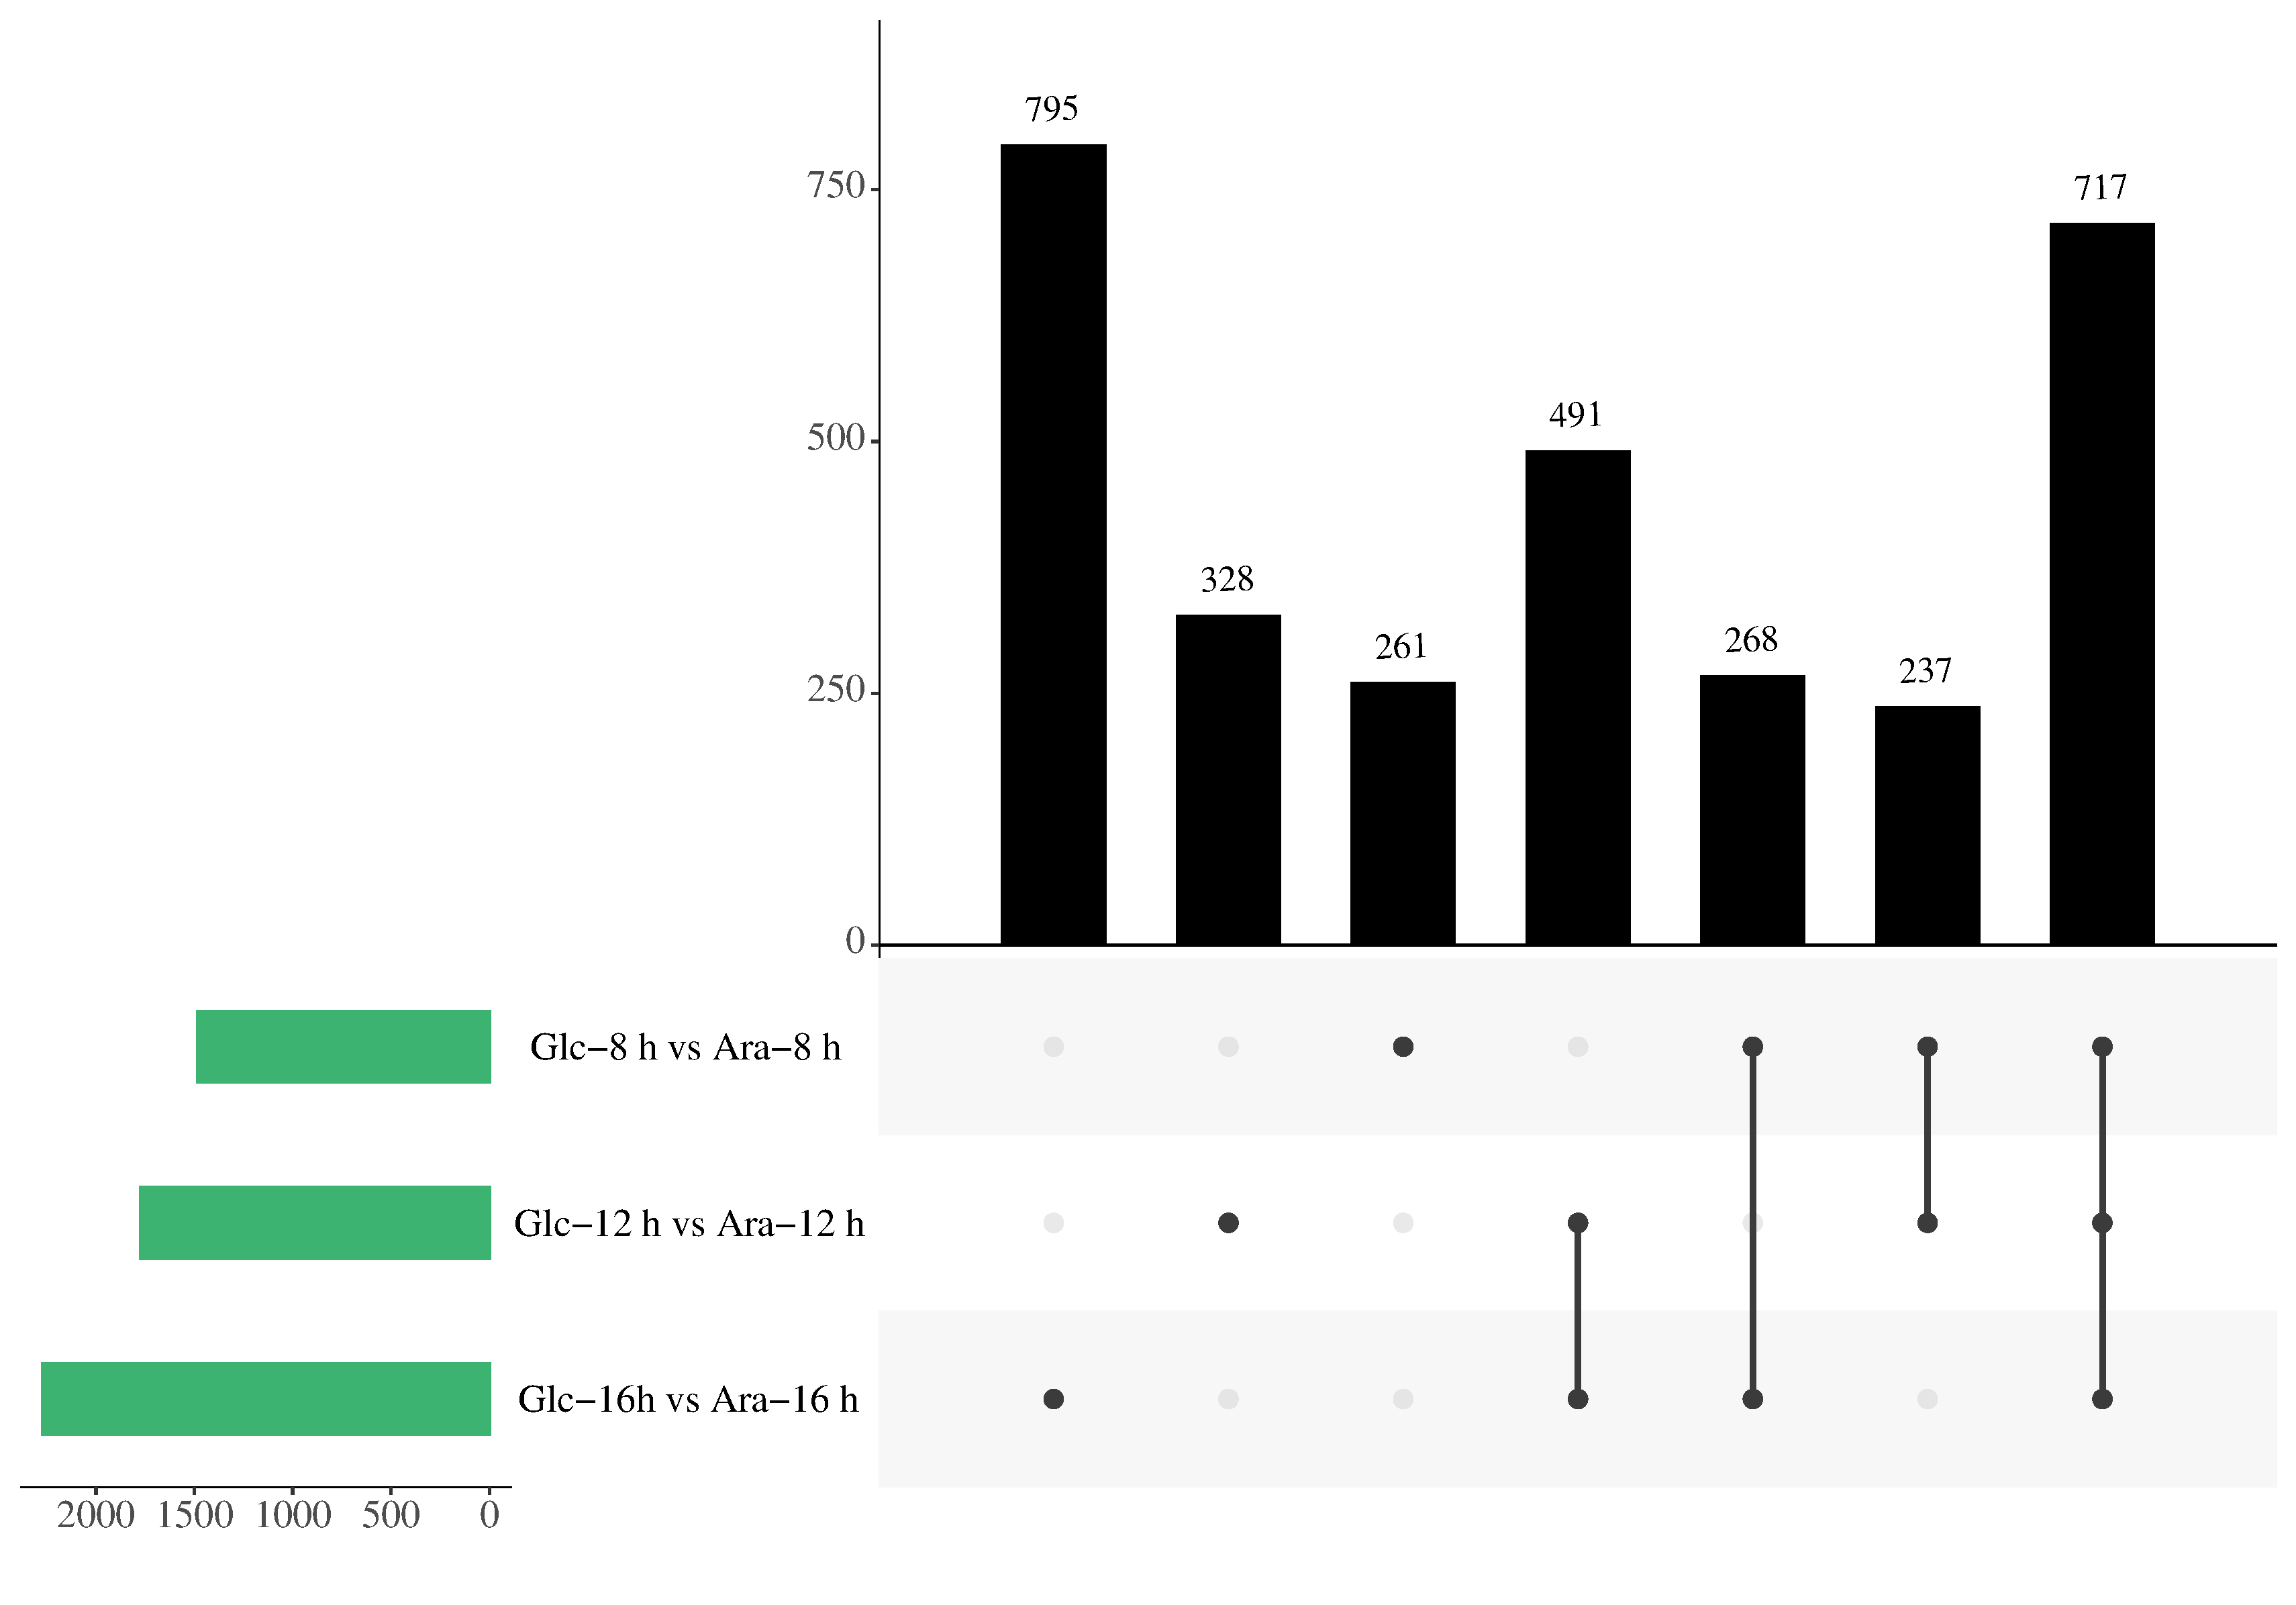


Supplementary Figure 3. Venn diagram analysis of DEGs in different comparisons.





Supplementary Figure 4. Proportion of spores of strain NCD-2 wild type (WT), msmX-null mutant (ΔmsmX) and its complemented strain (CPmsmX) in M9 medium with L-arabinose as carbon sources, at 24, 48 and 72 h after inoculation.

Supplementary table 1 Primers used in this study

| Primer | Sequence（5’ to 3’） | Function |
| --- | --- | --- |
| *cotY*-F | AAGGCGGATTGTTCTCCA | qRT-PCR for *cotY* |
| *cotY*-R | TCTGGTGACAGGCACTGAAT |
| *dpaA*-F | CAGGAGAAGGTGTCGTATCG | qRT-PCR for *dpaA* |
| *dpaA*-R | TCATCCCGCTCAAACAGT |
| *dpaB*-F | CGATTGTAAAGGCAGAACCT | qRT-PCR for *dpaB* |
| *dpaB*-R | GAGATACCCAGAACGACAGG |
| *msmX*-F | GACCTCTTTGCCGATGTAGC | qRT-PCR for *msmX* |
| *msmX*-R | GGACGCCGAAGGATGTTTA |
| *sspA*-F | ACTCAGGTAACAGCAACAACC | qRT-PCR for *sspA* |
| *sspA*-R | TCCTCCAACAGAACCGTT |
| *sspB*-F | TAACCTTGGAGCGGACACT | qRT-PCR for *sspB* |
| *sspB*-R | TGCTGCTGAGCGAAAGAT |
| *tuaC*-F | CGTAGGTTCTGCGTCAGTTG | qRT-PCR for *tuaC* |
| *tuaC*-R | GATTTCCTCTTTCGTCTCCTCA |
| *spoIIQ*-F | AAGAGAAAGAAGCAGCACTCG | qRT-PCR for *spoIIQ* |
| *spoIIQ*-R | CGCTCAGAGAAGCAGAGACA |
| *Spo0E*-F | AAGAGAAAGAAGCAGCACTCG | qRT-PCR for *Spo0E* |
| *Spo0E*-R | CGCTCAGAGAAGCAGAGACA |
| *sdpC*-F | CGATTGACAGCAAAGACCC | qRT-PCR for *sdpC* |
| *sdpC*-R | GCATAAAGCCCACAAGATGG |
| *leuA*-F | TTCGTGATGGTGAACAGTCC | qRT-PCR for *leuA* |
| *leuA*-R | TCTTGCGATTTCCTGAACAG |
| *ilvC*-F | CGGCGGATGTAGATGTATTCT | qRT-PCR for *ilvC* |
| *ilvC*-R | GCTTTGTCTCTTGCTTCTCCA |
| *srfAA*-F | CGGCGGATGTAGATGTATTCT | qRT-PCR for *srfAA* |
| *srfAA*-R | GCTTTGTCTCTTGCTTCTCCA |
| *ppsC*-F | TGATGCTCTATTGGTTGGACTG | qRT-PCR for *ppsC* |
| *ppsC*-R | TAGCCCGATTCCGAAACA |
| *gyrB*-F | GAAGCACGGACAATCACC | referenc gene |
| *gyrB*-R | TCCAAAGCACTCTTACGG |

Supplementary table 2 Verification of differently express genes by RT-qPCR

| Gene | log­­­­­2(Ara/Glc) (transcriptome) | | |  | log­­­­­2(Ara/Glc) (RT-qPCR) | | |
| --- | --- | --- | --- | --- | --- | --- | --- |
| 8 h | 12 h | 16 h |  | 8 h | 12 h | 16 h |
| *cotY* | 5.16 | 7.90 | 9.47 |  | 5.76 | 8.83 | 9.01 |
| *dpaA* | 6.30 | 6.84 | 4.81 |  | 5.50 | 6.42 | 5.10 |
| *dpaB* | 5.76 | 6.12 | 4.21 |  | 5.12 | 5.98 | 4.37 |
| *msmX* | 2.96 | 1.35 | -a |  | 3.14 | 1.51 | - |
| *sspA* | 7.23 | 3.14 | 1.67 |  | 8.11 | 3.51 | 2.01 |
| *sspB* | 7.40 | 3.43 | 2.66 |  | 7.71 | 3.25 | 3.05 |
| *tuaC* | 1.65 | 1.12 | 5.15 |  | 1.78 | 1.35 | 4.82 |
| *spoIIQ* | 5.69 | 1.78 | -1.82 |  | 5.47 | 1.33 | -2.04 |
| *spo0E* | - | -1.75 | -1.93 |  | - | -2.21 | -2.34 |
| *sdpC* | -1.23 | -5.57 | -6.81 |  | -1.77 | -6.08 | -7.71 |
| *leuA* | -1.34 | -1.03 | -2.98 |  | -1.19 | -1.28 | -3.22 |
| *ilvC* | -1.45 | -1.36 | -3.80 |  | -1.73 | -1.39 | -3.77 |
| *srfAA* | -2.46 | -1.88 | -2.41 |  | -2.89 | -1.79 | -2.50 |
| *ppsC* | -3.00 | -4.75 | -4.66 |  | -3.25 | -4.17 | -4.23 |

a: “-” means no significant difference in gene expression between L-arabinose (Ara) treatment and D-glucos (Glc) treatment
